1 **A Quadrivalent mRNA immunization elicits potent immune responses**  
2 **against vaccinia and monkeypox viral antigens – a step closer to a**  
3 **broad orthopoxvirus vaccine**

4 **Caixia Su<sup>1</sup>, Yang Wen<sup>1</sup>, Xiya Geng<sup>1</sup>, Chunmei Yang<sup>1</sup>, Quanyi Yin<sup>1</sup>, Yelin Xiong<sup>1,2#</sup>,**  
5 **Zhihua Liu<sup>1#</sup>**

6

7 1. Department of Research and Development, Yither Biotech Co., Ltd. Pudong, Shanghai, China

8 2. Ab&B Biotech Co., Ltd. Taizhou, Jiangsu, China

9 #Corresponding author: Yelin Xiong ([eileen.xiong@yitherbiotech.com](mailto:eileen.xiong@yitherbiotech.com)), Zhihua Liu ([zhihua.liu@yitherbiotech.com](mailto:zhihua.liu@yitherbiotech.com))

10

11 **Abstract**

12 The global outbreak of the 2022 monkeypox virus infection of human raised the public  
13 health concerns of the threat of human-to-human transmission of zoonotic diseases.  
14 Given the evidence that other orthopoxviruses including cowpox and camelpox were  
15 also reported infectious to human, and that the reemerging risk of smallpox as a  
16 bioterrorist or accidental laboratory escape exists, there is an urgent need to develop a  
17 poxvirus vaccine with a broad protection of orthopoxviruses to stockpile for future  
18 emergency. Extensive studies of vaccinia virus (VACV) suggested that multiple VACV  
19 antigens, such as A27, L1, A33 and B5, showed high level similarity in terms of  
20 immunogenicity to their respective homologous antigens of other orthopoxviruses.  
21 These findings paved the ground for VACV antigens to be used as potential vaccine  
22 targets for development of a universal poxvirus vaccine. In this study, we construct a  
23 novel poxvirus vaccine candidate, mRNA-ALAB-LNP, encoding four vaccinia viral  
24 antigens A27, L1, A33 and B5. Strong anti-L1-specific antibody and moderate anti-  
25 A33-, anti-A27- and anti-B5-specific antibody responses were induced in mice after a  
26 single immunization. The antibody responses to all four antigens were significantly  
27 boosted after the second shot with all IgG titers >5 logs and highest being anti-A33 IgG.  
28 The high level of binding antibodies showed potent neutralizing capability against  
29 vaccinia virus. Specific IFN- $\gamma$  responses were detected to all four antigens with the

30 highest cellular response being that induced by the same antigen, A33. When evaluating  
31 the cross reactivity, equivalent or better serum IgG responses were seen in responses to  
32 corresponding monkeypox antigens A35, M1, A29 and B6, in comparison to vaccinia  
33 antigens. Apparently, the mRNA vaccine encoding four vaccinia antigens induced  
34 immunity not only to vaccinia virus but also to monkeypox, suggesting that the mRNA-  
35 ALAB may be a candidate for potential vaccine development against infection of  
36 monkeypox, smallpox and possibly other orthopoxviruses.

37

## 38 **Introduction**

39 Orthopoxviruses belong to the family Poxviridae and the genus orthopoxvirus contain  
40 12 species including smallpox, monkeypox, vaccinia, camelpox and cowpox virus.  
41 Smallpox (caused by variola virus) was one of the most devastating human diseases  
42 that caused millions of deaths before it was eradicated in 1980 (Derrick B.1988).  
43 Following the eradication of the naturally-occurring smallpox, risk of variola infection  
44 is minimum with the possible sources of infection being deliberate release of virus for  
45 military purposes or accidental escape of virus from a laboratory. During 2021 to 2022,  
46 monkeypox outbreaked in African countries with 1329 cases and 68 deaths reported  
47 followed by the first case outside Africa spotted in the UK and subsequently the virus  
48 spread within 6 months globally with total cases of over 80 thousands (Mitjà et al.,  
49 2023). The sequence analysis showed that the virus belongs to the West African branch  
50 (Mitjà et al., 2023), one of the two distinct clades of monkeypox, despite that the  
51 understanding of the factors leading to the current outbreak is limited (Gessain et al.,  
52 2022; Lum et al., 2022). The monkeypox epidemic indicated that monkeypox virus, as  
53 a pathogenic orthopoxvirus, can become another pathogen potentially threatening  
54 public health and safety after smallpox.

55 To our knowledge, monkeypox is not the only orthopoxvirus that possess potential  
56 threats. Cowpox infection of human occurred in Europe and adjacent Russian states.  
57 One common host is the domestic cat, from which human infections are most often  
58 acquired (Bennett et al., 1990). Cowpox virus has also infected a variety of animals in  
59 European zoos, such as elephants, resulting in human infection (Kurth et al., 2008).  
60 Camelpox is another orthopoxvirus that is very closely related to the variola virus and

61 vaccinia. The camelpox virus most often affects members of family Camelidae.  
62 However, recent studies show that the disease can be transmitted to both humans and  
63 arthropods (Duraffour et al., 2011; Jezek et al., 1983). The most recently described  
64 orthopoxvirus species that infected human is the Alaskapox virus, first isolated in 2015  
65 (Gigante et al., 2019). At this point, in addition to risk of deliberate military release and  
66 accidental laboratory release of smallpox, there is a threat of zoonotic orthopoxvirus to  
67 human health. Development of a more effective poxvirus vaccine with a broader  
68 protection and scalable manufacturing process is imminent.

69 To develop an effective broad orthopoxvirus vaccine, understanding of the variations  
70 between family members is important. The genome of vaccinia (Goebel et al., 1990),  
71 variola virus (Massung et al., 1994), monkeypox (Shchelkunov et al., 2001), camelpox  
72 (Afonso et al., 2002), ectromelia virus (Mavian et al., 2014) and cowpox virus  
73 (Shchelkunov et al., 1998) have been sequenced and the results demonstrated that all  
74 viruses are morphologically indistinguishable and antigenically related. Any prior  
75 infection with one virus will provide some protection against each other members of  
76 the genus (Fenner et al., 1989). Using a poxvirus-specific tool, accurate gene sets for  
77 viruses with completely sequenced genomes in Orthopoxvirus were predicted, such that,  
78 in all existing Orthopoxvirus species, no individual species has acquired protein-coding  
79 genes unique to that species (Hendrickson et al., 2010). This was the foundation for  
80 cowpox virus and vaccinia virus being effective vaccines against smallpox and  
81 monkeypox. Based on the above, we reasonably speculate that a vaccine targeting  
82 proper vaccinia viral antigens may provide protective immune responses against broad  
83 orthopoxviruses.

84 The vaccinia virus, like other orthopoxviruses, contains a linear double-stranded DNA  
85 genome (Gessain et al., 2022), encoding about 200 proteins, including various proteins  
86 and enzymes required for virus replication, virus assembly, host restriction,  
87 pathogenicity and other processes. The virus often exists in two different infectious  
88 forms, the intracellular mature viruses (IMV) and extracellular enveloped viruses  
89 (EEV), whose surface glycoproteins infect cells using different mechanisms  
90 (Franceschi et al., 2015). Early studies show that the four membrane proteins A27, L1,

91 A33, and B5 of vaccinia virus are involved in the adsorption, binding, and intercellular  
92 transmission of virus-infected cells (Chung et al., 1998; Foo et al., 2009; Smith et al.,  
93 2002). The A27 protein and the L1 protein on IMV are generally considered to mediate  
94 the attachment and binding of virus to cells, while the A33 protein and B5 protein  
95 on EEV are considered to mediate the spread of virus between cells. Polyclonal and  
96 monoclonal antibodies against these four proteins have high level neutralizing activity  
97 to vaccinia virus (Gilchuk et al., 2016; Kaeffer et al., 2014; Law and Smith, 2001; Lustig  
98 et al., 2005; Paran and Lustig, 2010; Zajonc, 2017), monkeypox virus (Gilchuk et al.,  
99 2016), cowpox virus (Gilchuk et al., 2016) and variola virus (Gilchuk et al., 2016).  
100 Recombinant protein platform and DNA platform used to deliver A27, L1, A33, B5  
101 alone or in combination can induce protective neutralizing antibody responses in mice  
102 (Hooper et al., 2000; Hooper et al., 2003; Hooper et al., 2004; Reeman et al., 2017) and  
103 monkeys (Buchman et al., 2010) against vaccinia virus and monkeypox virus with no  
104 safety concern observed. Sequence analysis confirm that these four vaccinia viral  
105 antigens and their homologous proteins in monkeypox virus (A29, M1, A35 and B6,  
106 respectively) and smallpox virus are highly conserved (the conservation score of all  
107 antigens are  $\geq 93\%$ , among which L1 is the most conserved, with a conservation  $\geq 98.8\%$ )  
108 (Hooper et al., 2003). These suggest that A27, A33, B5, and L1 can be used as targets  
109 for the development of vaccines against vaccinia and potentially other orthopoviruses  
110 such as monkeypox. In this study, monkeypox virus antigens were chosen for testing  
111 such vaccine's cross reactivity.

112 At present, the available pox vaccines include the following: attenuated vaccinia virus  
113 ACAM2000 by Acambis (2<sup>nd</sup> generation) and further attenuated (replication-defective in  
114 mammalian cells) vaccinia virus (Ankara) vaccine MVA-BN or Jynneos (3<sup>rd</sup> generation)  
115 by Bavarian Nordic and a similar LC16m8 by Chiba (with restricted use in Japan).  
116 Although, these vaccines have been proved efficacious against smallpox in clinical  
117 trials (Kennedy and Greenberg, 2009a; Kenner et al., 2006a; Nalca and Zumbun, 2010)  
118 and approved for containment of the recent outbreak of monkeypox, the vaccines face  
119 problems such as side effects, weak immunogenicity and low productivity to meet  
120 market need. New vaccines with higher efficacy and productivity as well as better safety

121 profile are in urgent demand. Recently, mRNA vaccines have attracted much more  
122 attention due to its excellent immunogenicity, short preparation time and high yield and  
123 good safety data, which have been verified by intensive use of the two marketed  
124 COVID19 mRNA vaccines.

125 In this study, we have developed a mRNA vaccine candidate expressing four vaccinia  
126 viral antigens A27, L1, A33 and B5 in tandem in one molecule delivered by a LNP  
127 system to evaluate the immunogenicity against vaccinia and cross immunogenicity  
128 against other poxviruses in a mouse model. Immunization of mice with the candidate  
129 mRNA vaccine induced excellent vaccinia antigen-specific binding antibodies,  
130 neutralizing antibody responses and cellular immune responses. Strikingly, the sera  
131 from the vaccine-immunized mice cross reacted with all four monkeypox homologous  
132 antigens, holding promise for this mRNA vaccine candidate to be used for protection  
133 of broad orthopoxvirus infection.

134

## 135 **Results**

### 136 **Design and synthesis of the mRNA molecule**

137 A conventional mRNA sequence was designed to contain a cap structure, 5'UTR  
138 untranslated region, CDS translated region, 3'UTR untranslated region and a PolyA  
139 structure. The CDS translation region expresses four tandem VACV antigen molecules  
140 (A27, L1, A33, B5) separated by linkers, and the mRNA molecule was named mRNA-  
141 ALAB. A T7 promoter was added to the 5' end of the complete mRNA sequence and a  
142 BspQI restriction enzyme cutting site was added to the 3' end followed by cloning of  
143 the molecule into the synthetic plasmid vector pUCYH (Figure 1A). Digestion of the  
144 plasmid with BspQI can effectively linearize the plasmid template (Figure 1B). The  
145 mRNA-ALAB molecule was synthesized by in vitro transcription reaction using  
146 linearized plasmid as templates. Good integrity (Figure 1C) and purity of the  
147 synthesized mRNA (Figure 1D) were demonstrated using agarose gel electrophoresis  
148 and HPLC-SEC analysis. The capping efficiency of the mRNA-ALAB molecule was  
149 higher than 98% (data not shown).

150

## 151 **Preparation and characterization of mRNA-ALAB-LNP Prototype**

152 In this research, the mRNA-ALAB and lipids were fully mixed using microfluidic  
153 technology and formed mRNA-ALAB-LNP lipid nanocomplex (Figure 2A). Particle  
154 size of the mRNA-ALAB-LNP vaccine prototype was about 84 nanometers, while the  
155 empty LNP was about 75 nanometers (Figure 2B). The polymer dispersity index (PDI)  
156 of the mRNA-ALAB-LNP vaccine prototype and the empty LNP were all less than 0.1  
157 (Table 1), indicating good uniformity of the nanoparticles. The encapsulation efficiency  
158 (EE) of mRNA in LNP was approximately 98% (Table 1). The transfection efficiency  
159 of mRNA-ALAB-LNP was demonstrated by flow cytometry data showing that  
160 transfected HEK293T cells were 20%, 85%, 6% and 75% positive for anti-A27, anti-  
161 L1, anti-A33 and anti-B5 staining, respectively (Figure 3, Figure S1).

162

## 163 **Prototype mRNA-ALAB-LNP vaccine induced excellent antigen-specific binding** 164 **antibody responses in mice**

165 In order to study the immunogenicity of the mRNA vaccine, 6-8 weeks old BALB/c  
166 mice were immunized by intramuscular injection twice at a 2-week interval (Figure 4A)  
167 with a dose of 20ug per injection. Blood samples were collected on day -3 (before  
168 prime), day 14 (2 weeks post prime), day 28 (4 weeks post prime), and day 42 (2 weeks  
169 post boost) for detection of antigen-specific binding antibodies (Figure 4B-4E). Spleens  
170 were taken at 45 days after second immunization for evaluation of cellular immunity.  
171 Strong anti-L1-specific and moderate anti-A33-, anti-A27- and anti-B5-specific  
172 antibody responses were induced after the first immunization and the antibody  
173 responses against all four antigens increased overtime. The mean titers of anti-A27  
174 antibodies increased from 2,040 at 2 weeks post prime to 3,000 at 4 weeks post prime.  
175 Similarly, the anti-L1 antibodies increased from 24,840 (2 weeks post prime) to 55,080  
176 (4 weeks post prime), anti-A33 antibodies increased from 2,680 (2 weeks post prime)  
177 to 17,640 (4 weeks post prime), and anti-B5 antibodies increased from 360 (2 weeks  
178 post prime) to 1,320 (4 weeks post prime). The antibody levels against the four antigens  
179 increased significantly after the boost immunization, with mean antibody titers of anti-  
180 A27, anti-L1, anti-A33, and anti-B5 reaching 110,000, 810,000, 14,580,000 and  
181 202,000, respectively. These results proved that the mRNA-ALAB-LNP vaccine

182 candidate has induced potent VACV antigen specific binding antibody responses  
183 (Figure 4B-4E).

184

185 **mRNA-ALAB-LNP vaccine immune sera showed potent poxvirus neutralization**  
186 **activity**

187 In order to determine whether the antibodies produced by the mRNA-ALAB-LNP  
188 vaccine have virus neutralization activity, we incubated the inactivated serum from two  
189 weeks after boosting with 100 CCID<sub>50</sub> of VACV virus for detection of neutralizing  
190 activity. Neutralizing activity of the serum was calculated by observing and grading the  
191 cytopathic effect (CPE). Both viral control (VC) and the immune serum from empty-  
192 LNP immunized mice, at a dilution of 1:80, did not exhibit neutralizing activity with  
193 obvious CPE shown in infected BSC-1 cells (Figure 5A). On the contrary, the immune  
194 serum from mRNA-ALAB-LNP vaccinated mice, at a dilution of 1:80 and 1:640 and  
195 even at 1:1280, showed protection of cells from virus infection with no CPE seen in  
196 infected BSC-1 cells (Figure 5A). The mean neutralizing antibody titer of mRNA-  
197 ALAB-LNP vaccinated group could reach 1,431 in this assay (Figure 5B).

198

199 **mRNA-ALAB-LNP vaccine induced antigen specific cellular immune responses in**  
200 **mice**

201 To explore whether the mRNA vaccine can induce specific cellular immune responses  
202 in mice, the mouse spleenocytes were collected at 45 days post boosting for detection  
203 of IFN- $\gamma$  positive T cells specific to 6 antigen peptide libraries A27, L1-1, L1-2, A33,  
204 B5-1, B5-2, respectively using ELISPOT assay. Specific IFN- $\gamma$  responses were detected  
205 to all four antigens and the responses were significantly higher than that of the control  
206 group immunized with empty LNP (Figure 6A). The A27 peptide pool and the A33  
207 peptide pool stimulated higher level of IFN- $\gamma$  with 904 spots/million cells and 2,747  
208 spots/million cells recorded, respectively. In line with the highest total specific IgG  
209 response being anti-A33 (Figure 3D), the highest IFN- $\gamma$  response was also seen in  
210 response to A33 peptide pool (Figure 6B). Moreover, no cellular immunity was detected  
211 against the linker.

212

213 **Sera from mRNA-ALAB-LNP vaccinated mice showed high level cross-binding**

## 214 **activity to monkeypox virus homologous antigens**

215 Previous studies have shown that the four vaccinia virus antigens (A27, L1, A33, B5)  
216 are highly conserved among monkeypox virus, cowpox virus, and smallpox virus  
217 (Hooper et al., 2003). In this study, we tested whether the mRNA vaccine encoding  
218 these antigens could generate cross immunity against monkeypox homologous proteins  
219 A29, M1, A35 and B6, respectively. The immune sera from mice immunized with  
220 mRNA-ALAB-LNP were serially diluted and incubated with four proteins A29, M1,  
221 A35, and B6 to detect cross-binding antibody titers. ELISA results showed that strong  
222 serum IgG responses were seen in response to respective monkeypox antigens A35, M1,  
223 A29 and B6 after the first immunization and the titers increased overtime. (Figure 7A-  
224 7D). The average titers of anti-A29 antibody increased from 2,040 (2 weeks post prime)  
225 to 4,440 (4 weeks post prime), anti-M1 antibody increased from 74,520 (2 weeks post  
226 prime) to 184,680 (4 weeks post prime), anti-A35 antibody increased from 2,520 (2  
227 weeks post prime) to 9,000 (4 weeks post prime), and anti-B6 specific antibody  
228 increased from 5,880 (2 weeks post prime) to 10,920 (4 weeks post prime). Furthermore,  
229 all four antibody levels increased significantly 2 weeks after boosting immunization,  
230 with antibody titers of anti-A29, anti-M1, anti-A35 and anti-B6 reaching 110,000,  
231 2,430,000, 558,000, and 1,782,000, respectively. Collectively, these results  
232 demonstrated that mRNA-ALAB-LNP vaccine encoding vaccinia antigens (A27, L1,  
233 A33 and B5) induced equivalent or better cross-reactive antibodies against respective  
234 monkeypox antigens (A29, M1, A35, and B6) in mice. (Figure 7A-7D).

235

## 236 **Discussion and Conclusion**

237 Many efforts have been made to develop poxvirus vaccines, including live attenuated  
238 virus vaccine technology (Monath et al., 2004; Nalca and Zumbrun, 2010), replication-  
239 defective virus vaccine technology (Kennedy and Greenberg, 2009b; Kenner et al.,  
240 2006b), DNA vaccine technology (Heraud et al., 2006; Hooper et al., 2004), and  
241 recombinant protein technology (Buchman et al., 2010). Each has its own limitation  
242 such as severe skin side effects of live attenuated vaccine (Monath et al., 2004), poor  
243 immunogenicity of replication-deficient virus vaccines (Zaack et al., 2023) and DNA



244 vaccines (Heraud et al., 2006), and long development cycle of recombinant protein  
245 technology (Funk et al., 2021). Encouraged by the two new COVID19 mRNA vaccines,  
246 some researchers have also tried to use mRNA technology to develop monkeypox  
247 vaccines, mainly through design of multiple mRNAs to express a single or fused  
248 monkeypox antigen to induce antigen-specific humoral and cellular immunity (Alec et  
249 al., 2022; Fang et al., 2023; Hou et al., 2022; Sang et al., 2022; Zhang et al., 2023).  
250 Some of those design elicits potent immunogenicity, but will face challenges to deliver  
251 multiple mRNAs during process development and manufacturing. In this study, we  
252 designed a mRNA vaccine candidate to deliver four vaccinia antigens into cells in a  
253 single mRNA molecule. With regard to immunogenicity, this vaccine candidate induced  
254 strong humoral immune responses even after a single immunization in mice (yet to be  
255 tested in human). The efficiency of novel mRNA molecular design was also verified  
256 through induction of strong VACV-specific cellular immunity in mice. Furthermore, the  
257 potency of the four selected immune targets was proved by induction of significant  
258 levels of neutralizing antibody response. Yet, no obvious safety issue was observed after  
259 the mRNA vaccination in the mouse model, indicating a better safety. Additionally, the  
260 mRNA vaccine platform shortens the development cycle and the mRNA molecular  
261 design simplifies the manufacturing process, making the vaccine production process  
262 more feasible.

263 The purpose of this study is not only to generate a more efficacious and safer vaccine  
264 with a bigger productivity against potential crisis of smallpox, but also to develop a  
265 broader vaccine to provide protection against future pandemic that possibly caused by  
266 zoonotic poxviruses such as monkeypox, cowpox and camel pox, given that the recent  
267 monkeypox epidemic raised the poxvirus public health and safety concern and that  
268 cowpox and camelpox have been reported infectious to human. The sequence homology,  
269 morphological indistinguishability and antigenical relation are the basis for a broad  
270 poxvirus vaccine, pending on validation in animal studies and human trials. In this study,  
271 the quadrivalent mRNA-ALAB-LNP encoding four vaccinia viral antigens elicited  
272 equivalent or better binding antibody responses to monkeypox homologous antigens.  
273 The cross humoral reactivities between vaccinia and monkeypox were well

274 demonstrated. The cross reactivity induced by the mRNA vaccine encoding vaccinia  
275 viral antigens to other poxviral antigens will be further studied. The vaccinia antigen-  
276 specific antibodies induced by the mRNA-ALAB-LNP vaccine have demonstrated  
277 potent neutralizing activity of vaccinia virus. The neutralizing capability of monkeypox  
278 and possibly other poxviruses by this vaccine will be evaluated in future studies.  
279 In summary, we have developed a novel quadrivalent mRNA-ALAB-LNP vaccine  
280 candidate potentially against orthopoxviruses based on vaccinia viral antigen A27, L1,  
281 A35 and B5. The vaccine candidate elicited significant antibody response against  
282 vaccinia virus and monkeypox. The data demonstrated feasibility of mRNA-ALAB-  
283 LNP vaccine design and provided initial evidence of its potential as a broad  
284 orthopoxvirus vaccine candidate for its future optimization.

285

## 286 **Methods**

### 287 **Ethic Statement**

288 All experiments were performed strictly in accordance with the guidelines of care and  
289 use of laboratory animals by the Ministry of Science and Technology of the People's  
290 Republic of China. Animal protocols were approved by the Animal Care and Use  
291 Committee of Yither Biotech Co., Ltd.

292

### 293 **Cell and virus**

294 HeLa S3 and BSC-1 cell lines were purchased from Procell Life Science & Technology  
295 Co., Ltd. (Wuhan, China) and cultured in Ham's F-12K and MEM medium (Gibco)  
296 supplemented with 10% FBS (Gibco) and 1% antibiotics (Gibco), respectively.  
297 Vaccinia virus was purchased from ATCC and grown in HeLa S3 cells. The virus titer  
298 was determined in BSC-1 cells, adjusted to half of the cell culture infective dose  
299 (CCID<sub>50</sub>).

300

### 301 **Mice study**

302 Female 6- to 8-week-old BALB/c mice used for the experiments were grown under  
303 specific pathogen-free conditions at Bikai Laboratory Animal Co., LTD. Mice were  
304 randomly divided into two groups and immunized twice at an interval of 4 weeks with

305 mRNA vaccine candidate mRNA-ALAB-LNP (20ug) or the same volume of empty-  
306 LNP. Serum was collected before immunization and every 2 weeks after the first  
307 immunization for antigen-specific antibody detection and heterologous antigen cross-  
308 reactive antibody examination. Spleens were harvested for cellular immunity  
309 evaluation 45 days after the second immunization.

310

### 311 **Construction of recombinant plasmid**

312 The coding region expressing A27, L1, A33 and B5 proteins in tandem was designed  
313 and named as the ALAB region. The target molecule was obtained by adding the T7  
314 promoter sequence and 5' UTR sequence including Kozak sequence to the upstream of  
315 ALAB region and stop codon TGATAA, 3'UTR, PolyA and BspQI cleavage sites to  
316 the downstream of ALAB region. The target gene was next cloned into pUCYH plasmid  
317 by recombination and the recombinant plasmid ABLB-pUCYH sequence was  
318 confirmed by sequencing.

319

### 320 **ALAB mRNA preparation**

321 The recombinant plasmid ABLB-pUCYH was extracted and linearized by restriction  
322 endonuclease BspQI cleavage followed by the plasmid recovery and purification. In  
323 vitro transcription reaction (50ul) was performed at 37°C for 3h after vortexing of the  
324 mixture containing linearized plasmid template, ATP (100mM), GTP (100mM), CTP  
325 (100mM), UTP (100mM), Cap analogue (100mM, Vazyme), T7 RNA polymerase  
326 (200U/ul, Vazyme), 10X T7 Reaction Solution (Vazyme), RNase enzyme inhibitor  
327 (40U/ul, Vazyme), pyrophosphatase (0.1U/ul, Vazyme) and RNase Free H2O  
328 (Invitrogen™,10977015). After the IVT, 170ul RNase-free H2O, 5ul DNaseI enzyme  
329 (NEB, M0303L) and 25ul 10X DNaseI enzyme reaction solution (NEB, M0303L) were  
330 added and incubated at 37°C for 20 min. Purified mRNA was obtained using OligoDT  
331 beads (Vazyme, N401). mRNA integrity and purity were analyzed by Agarose Gel and  
332 HPLC-SEC.

333

### 334 **mRNA vaccine preparation**

335 Purified mRNA was diluted to 167ug/ml with PH4.0, 50 mM citric acid buffer to obtain

336 aqueous solution. The organic phase solution was prepared by dissolving ionizable lipid,  
337 DSPC (AVT, S01005), cholesterol (Sigma-Aldrich, C8667), and PEG2000-lipid  
338 (Avanti Polar Lipids, 880150P) in ethanol. The aqueous and organic phase solutions  
339 were siphoned into the INano™ L injector at a flow ratio of 3:1 with a total flow rate  
340 of 12ml/min for mRNA encapsulation. The mRNA-LNP complex was next rapidly  
341 diluted in PBS (pH7.4) and centrifuged at 3000rpm at 4°C for 10 min in 100kD  
342 ultrafiltration tube (Millipore). The mRNA-LNP complex was concentrated to  
343 0.4mg/ml followed by filtration using 0.22um filter membrane to obtain mRNA-  
344 ALAB-LNP vaccine. Particle size and PDI of mRNA-ALAB-LNP vaccine were  
345 analyzed by Malvern particle size analyzer. The encapsulation rate of the mRNA  
346 vaccine was determined by RiboGreen (Invitrogen™, R11490) nucleic acid dye.

347

#### 348 **Detection of antigen expression by flow cytometry**

349 Briefly, HEK293T cells were transfected with 5ug mRNA-ALAB-LNP or equal volume  
350 of Opti-MEM. After 24h culturing, cells were detached from the plate surface with PBS  
351 containing 3% FBS, followed by staining with aqua fluorescent reactive dye (Invitrogen,  
352 L34966A, 1:1000) to determine alive versus dead. For surface staining, cells were  
353 stained with anti-A33-serum, anti-B5-serum, anti-L1-serum at 1:200 dilution,  
354 respectively. For intracellular staining, cells were fixed with IC Fixation Buffer  
355 (Invitrogen, 00-8222-49), permeabilized (Invitrogen, Permeabilization Buffer, 00-  
356 8333-56) and stained with a mouse serum that recognizes A27 (1:200 dilution) followed  
357 by adding anti-mouse AF488 (Invitrogen, A55058, 1:1000) as secondary antibody.  
358 After staining, cells were acquired on a FACS Attune NxT Acoustic focusing cytometer  
359 and data were analyzed using FlowJo 10.8.1.

360

#### 361 **Antigen-specific binding antibody assay**

362 ELISA was used to detect the titer of antigen-specific antibody IgG in mouse serum.  
363 Each antigen (A27, A33, L1 and B5) was diluted to 1ug/ml with coating buffer and  
364 incubated overnight at 4 ° C in a 96-well plate. The serum was serially diluted by 2-  
365 fold and was next placed into the plate coated with 5% milk at 37°C for 1h. After  
366 washing with PBST, the plate was incubated with HRP-conjugated goat anti-mouse IgG

367 (1:4000) (Southern Biotech, Birmingham, AL, USA) and color reaction was developed  
368 by adding TMB (Invitrogen™, 002023) for 5 min followed by adding 50 µ L of ELISA  
369 terminating solution (New Cell & Molecular Biotech, E40500) to stop the reaction and  
370 the absorbance was measured at 450/620 nm using an ELISA plate reader (Thermo  
371 Fisher, Varioskan LUX). The mean OD (optical density) of sera from naïve mice was  
372 multiplied by 2.1 to define the positive cutoff point. The cross-binding activity of  
373 immunized mice sera with monkeypox virus antigen (A29, M1, A35 and B6) was  
374 detected by ELISA as described above. Results are presented as mean titers of  
375 antibodies in the sera.

376

### 377 **Neutralizing antibody assay**

378 To detect neutralizing antibodies, mice sera collected at 2 weeks post boosting were  
379 tested as follows: serum was inactivated at 56°C for 30 min, followed by 10 serial  
380 dilution (2-fold) with serum-free MEM medium (Gibco) starting from 1: 40. 50ul serum  
381 was next mixed with an equal volume of VACV (100 CCID<sub>50</sub>) and incubated at 37°C  
382 for 2h. The mixture was added to the 96-well cell plates with BSC-1 cells laid one day  
383 before (1x10<sup>4</sup> /well). After 3 days of incubation at 37°C, CPE and cell growth status  
384 were observed to determine the numbers of virus-infected wells and the infection rate  
385 at each dilution was calculated. Finally, the dilution that can reduce 50% virus infection  
386 was defined as neutralizing antibody titers.

387

### 388 **Cellular immune response assay**

389 The ELISPOT plate (Millipore, MSIPS4W10) was filled with 35% ethanol at 50ul/well  
390 for 1min. The liquid was discarded and the plate was washed with sterile deionized  
391 water at 200ul/well for 5 times. IFN-γ capturing antibody (MABTECH,3321-2H) was  
392 diluted to 15ug/ml with PBS and added to the above plates at 100ul/well and the plates  
393 were incubated at 4°C overnight. On the second day, the plates were washed with PBS,  
394 and RPMI 1640 medium (containing 10%FBS) was added followed by incubation at  
395 room temperature for 30min. Single cell suspension was obtained from a mouse spleen  
396 and cell numbers were counted after erythrocyte lysis. The culture medium in the plate  
397 was discarded and appropriate numbers of cells were added. Next, polypeptides were

398 added at a final concentration of 2.5ug/ml each. The plates were placed in an incubator  
399 set at 37°C for 36h followed by discarding the cells and washing with PBS. The diluted  
400 detection antibody (1:1000) (MABTECH,3321-2H) was added and the plate was  
401 incubated at room temperature for 2h. The diluted streptavidin-HRP (1:1000)  
402 (MABTECH,3321-2H) was added and the plate was incubated at room temperature for  
403 1h. Finally, TMB solution (MABTECH, 3651-10) was added followed by washing with  
404 deionized water after spots became obvious. After the plates were dried at room  
405 temperature, pictures were taken and the spots in the wells were counted using enzyme-  
406 linked immunospot analyzer (CTL, S6 Universal).

407

#### 408 **Statistical analysis**

409 Statistical analysis was done using GraphPad Prism 8.0 (GraphPad Software, San  
410 Diego, CA, USA) and results are presented as mean  $\pm$  standard error of the mean  
411 (SEM). The exact sample size (n) for each experimental group is indicated in the figure  
412 legends. Differences between two groups were analyzed with unpaired t-tests or two-  
413 way analysis of variance (ANOVA). P values  $< 0.05$  were considered statistically  
414 significant.

415

#### 416 **Conflicts of Interests:**

417 All authors are employees of Yither Biotech and Ab&B Biotech. A patent has been  
418 filed related to this study.

419

#### 420 **Acknowledgement:**

421 We would like to thank other colleagues involved in this work; This work was funded  
422 by Yither Biotech.

423

#### 424 **Authors Contribution:**

425 Supervision, Z. L; Conceptualization, Y. X and Z. L; Methodology, C. S, Q Y and Z. L;  
426 Formal analysis, C.S and Z. L; Investigation, C. S, X. G, Y. W and Z. L; Writing  
427 Original Draft, Z. L; Editing and Review, C. S, C. Y, Y. X and Z. L; Visualization, C.S

428 and Z. L;

429

### 430 **Figure Legends:**

431 **Figure 1.** mRNA-ALAB structure design and preparation. (A) Structural diagram of the mRNA  
432 designed (up) and recombinant plasmid for the ALAB-DNA (down). (B) Agarose gel  
433 electrophoresis of BspQI enzyme digestion of ALAB-pUCYH plasmid. M, DNA marker. I, the  
434 supercoiled plasmid. II, Linearized plasmid after digestion. (C) Agarose gel electrophoresis of  
435 purified mRNA. (D) Detection of purified mRNA by HPLC-SEC analysis.

436

437 **Figure 2.** Preparation of mRNA vaccine candidate mRNA-ALAB-LNP. (A) Schematic  
438 diagram of the mRNA-ALAB-LNP vaccine preparation. (B) Particle size of mRNA-LNP.

439

440 **Figure 3.** Expression of all four target proteins after mRNA-ALAB-LNP transfection.

441 (A-D) Percentage of antigen-expressing cells was detected by flow cytometry. Expression of  
442 target proteins (A27, L1, A33, B5) in mRNA-ALAB-LNP transfected cells were determined by  
443 immune staining with anti- A27-, anti-L1-, anti-A33-, anti-B5-serum respectively, using mock  
444 treated cells as negative control.

445

446 **Figure 4.** mRNA-ALAB-LNP elicits potent antibody response in mice. (A) Mice immunization  
447 schedule (n=5 for each group). The black and red arrows represent time points for  
448 immunizations and blood collection. (B-E) Serum binding antibody titer against A27 (B), L1  
449 (C), A33 (D) and B5 (E) at different time points were tested. Statistical significance was  
450 assessed by two-way ANOVA with Sidak's multiple comparisons test. Data are shown as means  
451  $\pm$  SEM.

452

453 **Figure 5.** mRNA-ALAB-LNP elicits strong neutralizing antibody against vaccinia virus. (A)  
454 Representative images of VACV neutralization assay. Cell control (CC), viral control (VC); (B)  
455 VACV neutralizing antibody titers of immune serum (n=5). Statistical significance was  
456 assessed by two-tailed unpaired Student's t-test. Data are shown as means  $\pm$  SEM.

457

458 **Figure 6.** mRNA-ALAB-LNP elicits cellular immune response in mice (n=4). (A)  
459 Representative IFN- $\gamma$ <sup>+</sup> T cell immunospots data from mice splenocytes stimulated with  
460 peptides. (B) Summary data of IFN- $\gamma$ <sup>+</sup> -secreting T cell numbers in splenocytes post  
461 stimulation. Statistical significance was assessed by two-way ANOVA with Sidak's multiple  
462 comparisons test. Data are shown as means  $\pm$  SEM.

463

464 **Figure 7.** mRNA-ALAB-LNP elicits potent cross-reactive antibodies against MPXV antigens.  
465 (A-D) Serum binding antibody titer against A29 (A), M1 (B), A35 (C) and B6 (D) were tested  
466 at different time points. Statistical significance was assessed by two-way ANOVA with Sidak's  
467 multiple comparisons test. Data are shown as means  $\pm$  SEM.

468

469 **Table 1.** Characterization of mRNA-ALAB-LNP and Empty-LNP.

470

471 **Figure S1.** Representative gating strategy of flow cytometry. Mock-transfected and mRNA-  
472 ALAB-LNP transfected HEK293T cells were detected for expression of L1 protein.

473

## 474 **References:**

- 475 Afonso, C.L., Tulman, E.R., Lu, Z., Zsak, L., Sandybaev, N.T., Kerembekova, U.Z., Zaitsev, V.L., Kutish, G.F.,  
476 and Rock, D.L. (2002). The genome of camelpox virus. *Virology* 295, 1-9.
- 477 Alec, W.F., Caroline, A., Patricia, L.E., Jeffrey, L.A., Gwo-Yu, C., Harini, N., Tiffany, F., Jason, G., Juan, I.M.,  
478 Ruth, H., *et al.* (2022). A monkeypox mRNA-lipid nanoparticle vaccine targeting virus binding, entry, and  
479 transmission drives protection against lethal orthopoxviral challenge. *bioRxiv*, 2022.2012.2017.520886.
- 480 Bennett, M., Gaskell, C.J., Baxby, D., Gaskell, R.M., Kelly, D.F., and Naidoot, J. (1990). Feline cowpox  
481 virus infection. *Journal of Small Animal Practice* 31, 167-173.
- 482 Buchman, G.W., Cohen, M.E., Xiao, Y., Richardson-Harman, N., Silvera, P., DeTolla, L.J., Davis, H.L.,  
483 Eisenberg, R.J., Cohen, G.H., and Isaacs, S.N. (2010). A protein-based smallpox vaccine protects non-  
484 human primates from a lethal monkeypox virus challenge. *Vaccine* 28, 6627-6636.
- 485 Chung, C.S., Hsiao, J.C., Chang, Y.S., and Chang, W. (1998). A27L Protein Mediates Vaccinia Virus  
486 Interaction with Cell Surface Heparan Sulfate. *Journal of Virology* 72, 1577-1585.
- 487 Duraffour, S., Meyer, H., Andrei, G., and Snoeck, R. (2011). Camelpox virus. *Antiviral research* 92, 167-  
488 186.
- 489 Fang, Z., Monteiro, V.S., Renauer, P.A., Shang, X., Suzuki, K., Ling, X., Bai, M., Xiang, Y., Levchenko, A.,  
490 Booth, C.J., *et al.* (2023). Polyvalent mRNA vaccination elicited potent immune response to monkeypox  
491 virus surface antigens. *Cell Research*.
- 492 Fenner, F., Wittek, R., and Dumbell, K.R. (1989). CHAPTER 4 - The Pathogenesis, Pathology, and  
493 Immunology of Orthopoxvirus Infections. In *The Orthopoxviruses*, F. Fenner, R. Wittek, and K.R. Dumbell,  
494 eds. (Academic Press), pp. 85-141.



495 Foo, C.H., Lou, H., Whitbeck, J.C., Ponce-de-León, M., Atanasiu, D., Eisenberg, R.J., and Cohen, G.H.  
496 (2009). Vaccinia virus L1 binds to cell surfaces and blocks virus entry independently of  
497 glycosaminoglycans. *Virology* 385, 368-382.

498 Franceschi, V., Parker, S., Jacca, S., Crump, R.W., Doronin, K., Hembrador, E., Pompilio, D., Tebaldi, G.,  
499 Estep, R.D., Wong, S.W., *et al.* (2015). BoHV-4-Based Vector Single Heterologous Antigen Delivery  
500 Protects STAT1(-/-) Mice from Monkeypoxvirus Lethal Challenge. *PLOS Neglected Tropical Diseases* 9,  
501 e0003850.

502 Funk, C.D., Laferrière, C., and Ardakani, A. (2021). Target Product Profile Analysis of COVID-19 Vaccines  
503 in Phase III Clinical Trials and Beyond: An Early 2021 Perspective. In *Viruses*.

504 Gessain, A., Nakoune, E., and Yazdanpanah, Y. (2022). Monkeypox. *New England Journal of Medicine*  
505 387, 1783-1793.

506 Gigante, C.M., Gao, J., Tang, S., McCollum, A.M., Wilkins, K., Reynolds, M.G., Davidson, W., McLaughlin,  
507 J., Olson, V.A., and Li, Y. (2019). Genome of Alaskapox Virus, A Novel Orthopoxvirus Isolated from Alaska.  
508 *Viruses* 11.

509 Gilchuk, I., Gilchuk, P., Sapparapu, G., Lampley, R., Singh, V., Kose, N., Blum, D.L., Hughes, L.J.,  
510 Satheshkumar, P.S., Townsend, M.B., *et al.* (2016). Cross-Neutralizing and Protective Human Antibody  
511 Specificities to Poxvirus Infections. *Cell* 167, 684-694.e689.

512 Goebel, S.J., Johnson, G.P., Perkus, M.E., Davis, S.W., Winslow, J.P., and Paoletti, E. (1990). The complete  
513 DNA sequence of vaccinia virus. *Virology* 179, 247-266, 517-263.

514 Hendrickson, R.C., Wang, C., Hatcher, E.L., and Lefkowitz, E.J. (2010). Orthopoxvirus genome evolution:  
515 the role of gene loss. *Viruses* 2, 1933-1967.

516 Heraud, J.-M., Edghill-Smith, Y., Ayala, V., Kalisz, I., Parrino, J., Kalyanaraman, V.S., Manischewitz, J., King,  
517 L.R., Hryniewicz, A., Trindade, C.J., *et al.* (2006). Subunit Recombinant Vaccine Protects against  
518 Monkeypox1. *The Journal of Immunology* 177, 2552-2564.

519 Hooper, J.W., Custer, D.M., Schmaljohn, C.S., and Schmaljohn, A.L. (2000). DNA Vaccination with Vaccinia  
520 Virus L1R and A33R Genes Protects Mice against a Lethal Poxvirus Challenge. *Virology* 266, 329-339.

521 Hooper, J.W., Custer, D.M., and Thompson, E. (2003). Four-gene-combination DNA vaccine protects mice  
522 against a lethal vaccinia virus challenge and elicits appropriate antibody responses in nonhuman  
523 primates. *Virology* 306, 181-195.

524 Hooper, J.W., Thompson, E., Wilhelmsen, C., Zimmerman, M., Ichou, M.A., Steffen, S.E., Schmaljohn,  
525 C.S., Schmaljohn, A.L., and Jahrling, P.B. (2004). Smallpox DNA Vaccine Protects Nonhuman Primates  
526 against Lethal Monkeypox. *Journal of Virology* 78, 4433-4443.

527 Hou, F., Zhang, Y., Liu, X., Murad, Y., Xu, J., Yu, Z., Hua, X., Song, Y., Ding, J., Huang, H., *et al.* (2022). Novel  
528 mRNA vaccines encoding Monkeypox virus M1R and A35R protect mice from a lethal virus challenge.  
529 bioRxiv, 2022.2011.2019.517190.

530 Jezek, Z., Kríz, B., and Rothbauer, V. (1983). Camelpox and its risk to the human population. *Journal of*  
531 *hygiene, epidemiology, microbiology, and immunology* 27, 29-42.

532 Kaefer, T., Meng, X., Matho Michael, H., Schlossman, A., Li, S., Sela-Culang, I., Ofran, Y., Buller, M., Crump  
533 Ryan, W., Parker, S., *et al.* (2014). Potent Neutralization of Vaccinia Virus by Divergent Murine Antibodies  
534 Targeting a Common Site of Vulnerability in L1 Protein. *Journal of Virology* 88, 11339-11355.

535 Kennedy, J.S., and Greenberg, R.N. (2009a). IMVAMUNE: modified vaccinia Ankara strain as an  
536 attenuated smallpox vaccine. *Expert Rev Vaccines* 8, 13-24.

537 Kennedy, J.S., and Greenberg, R.N. (2009b). IMVAMUNE®: modified vaccinia Ankara strain as an  
538 attenuated smallpox vaccine. *Expert Review of Vaccines* 8, 13-24.

- 539 Kenner, J., Cameron, F., Empig, C., Jobes, D.V., and Gurwith, M. (2006a). LC16m8: an attenuated smallpox  
540 vaccine. *Vaccine* 24, 7009-7022.
- 541 Kenner, J., Cameron, F., Empig, C., Jobes, D.V., and Gurwith, M. (2006b). LC16m8: An attenuated  
542 smallpox vaccine. *Vaccine* 24, 7009-7022.
- 543 Kurth, A., Wibbelt, G., Gerber, H.P., Petschaelis, A., Pauli, G., and Nitsche, A. (2008). Rat-to-elephant-to-  
544 human transmission of cowpox virus. *Emerging infectious diseases* 14, 670-671.
- 545 Law, M., and Smith, G.L. (2001). Antibody Neutralization of the Extracellular Enveloped Form of Vaccinia  
546 Virus. *Virology* 280, 132-142.
- 547 Lum, F.-M., Torres-Ruesta, A., Tay, M.Z., Lin, R.T.P., Lye, D.C., Rénia, L., and Ng, L.F.P. (2022). Monkeypox:  
548 disease epidemiology, host immunity and clinical interventions. *Nature Reviews Immunology* 22, 597-  
549 613.
- 550 Lustig, S., Fogg, C., Whitbeck, J.C., Eisenberg Roselyn, J., Cohen Gary, H., and Moss, B. (2005).  
551 Combinations of Polyclonal or Monoclonal Antibodies to Proteins of the Outer Membranes of the Two  
552 Infectious Forms of Vaccinia Virus Protect Mice against a Lethal Respiratory Challenge. *Journal of*  
553 *Virology* 79, 13454-13462.
- 554 Massung, R.F., Liu, L.I., Qi, J., Knight, J.C., Yuran, T.E., Kerlavage, A.R., Parsons, J.M., Venter, J.C., and  
555 Esposito, J.J. (1994). Analysis of the complete genome of smallpox variola major virus strain Bangladesh-  
556 1975. *Virology* 201, 215-240.
- 557 Mavian, C., López-Bueno, A., Bryant, N.A., Seeger, K., Quail, M.A., Harris, D., Barrell, B., and Alcami, A.  
558 (2014). The genome sequence of ectromelia virus Naval and Cornell isolates from outbreaks in North  
559 America. *Virology* 462-463, 218-226.
- 560 Mitjà, O., Ogoina, D., Titanji, B.K., Galvan, C., Muyembe, J.-J., Marks, M., and Orkin, C.M. (2023).  
561 Monkeypox. *The Lancet* 401, 60-74.
- 562 Monath, T.P., Caldwell, J.R., Mundt, W., Fusco, J., Johnson, C.S., Buller, M., Liu, J., Gardner, B., Downing,  
563 G., Blum, P.S., *et al.* (2004). ACAM2000 clonal Vero cell culture vaccinia virus (New York City Board of  
564 Health strain) -- a second-generation smallpox vaccine for biological defense. *International Journal of*  
565 *Infectious Diseases* 8, 31-44.
- 566 Nalca, A., and Zumbrun, E.E. (2010). ACAM2000: the new smallpox vaccine for United States Strategic  
567 National Stockpile. *Drug design, development and therapy* 4, 71-79.
- 568 Paran, N., and Lustig, S. (2010). Complement-bound human antibodies to vaccinia virus B5 antigen  
569 protect mice from virus challenge. *Expert Review of Vaccines* 9, 255-259.
- 570 Reeman, S., Gates, A.J., Pulford, D.J., Krieg, A., and Ulaeto, D.O. (2017). Protection of Mice from Lethal  
571 Vaccinia Virus Infection by Vaccinia Virus Protein Subunits with a CpG Adjuvant. In *Viruses*.
- 572 Sang, Y., Zhang, Z., Liu, F., Lu, H., Yu, C., Sun, H., Long, J., Cao, Y., Mai, J., Wang, X., *et al.* (2022).  
573 Monkeypox virus quadrivalent mRNA vaccine induces antibody responses and cellular immunity and  
574 protects mice against Vaccinia virus. *bioRxiv*, 2022.2011.2022.517500.
- 575 Shchelkunov, S.N., Safronov, P.F., Totmenin, A.V., Petrov, N.A., Ryazankina, O.I., Gutorov, V.V., and Kotwal,  
576 G.J. (1998). The genomic sequence analysis of the left and right species-specific terminal region of a  
577 cowpox virus strain reveals unique sequences and a cluster of intact ORFs for immunomodulatory and  
578 host range proteins. *Virology* 243, 432-460.
- 579 Shchelkunov, S.N., Totmenin, A.V., Babkin, I.V., Safronov, P.F., Ryazankina, O.I., Petrov, N.A., Gutorov, V.V.,  
580 Uvarova, E.A., Mikheev, M.V., Sisler, J.R., *et al.* (2001). Human monkeypox and smallpox viruses: genomic  
581 comparison. *FEBS letters* 509, 66-70.
- 582 Smith, G.L., Vanderplasschen, A., and Law, M. (2002). The formation and function of extracellular

583 enveloped vaccinia virus. *Journal of General Virology* 83, 2915-2931.

584 Zaeck, L.M., Lamers, M.M., Verstrepen, B.E., Bestebroer, T.M., van Royen, M.E., Götz, H., Shamier, M.C.,  
585 van Leeuwen, L.P.M., Schmitz, K.S., Alblas, K., *et al.* (2023). Low levels of monkeypox virus-neutralizing  
586 antibodies after MVA-BN vaccination in healthy individuals. *Nature Medicine* 29, 270-278.

587 Zajonc, D.M. (2017). Antibody Recognition of Immunodominant Vaccinia Virus Envelope Proteins. In  
588 *Macromolecular Protein Complexes: Structure and Function*, J.R. Harris, and J. Marles-Wright, eds.  
589 (Cham: Springer International Publishing), pp. 103-126.

590 Zhang, R.R., Wang, Z.J., Zhu, Y.L., Tang, W., Zhou, C., Zhao, S.Q., Wu, M., Ming, T., Deng, Y.Q., Chen, Q.,  
591 *et al.* (2023). Rational development of multicomponent mRNA vaccine candidates against mpox.  
592 *Emerging Microbes & Infections* 12, 2192815.

593

**A**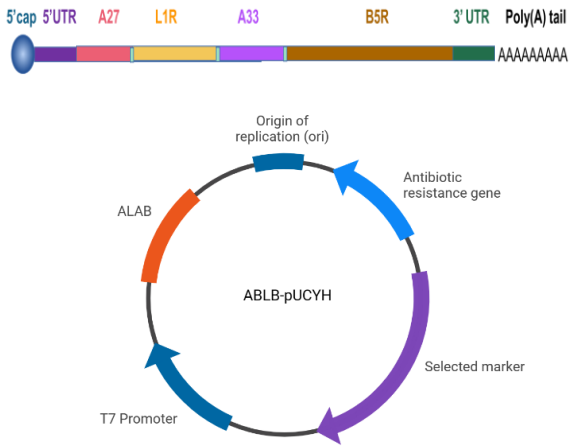**B**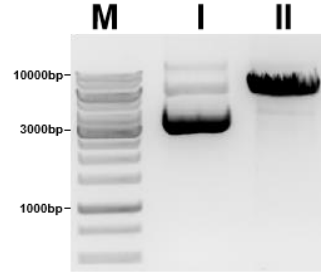**C**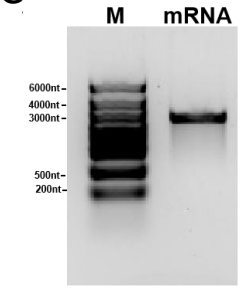**D**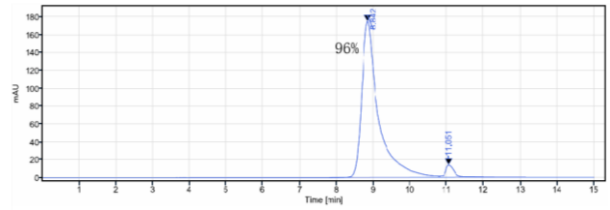**Figure 1**

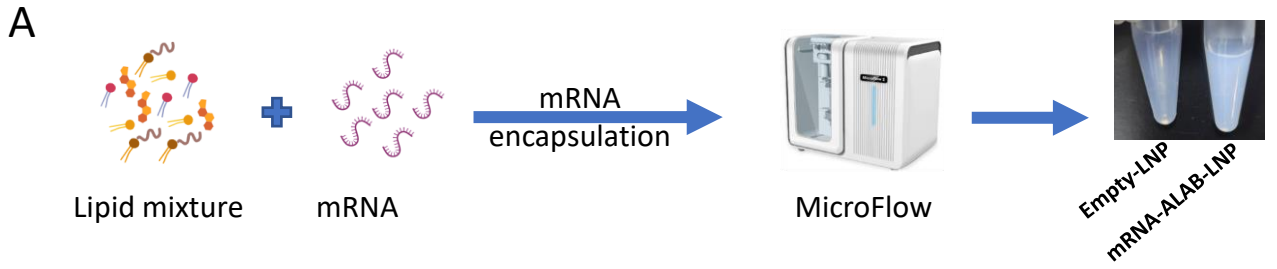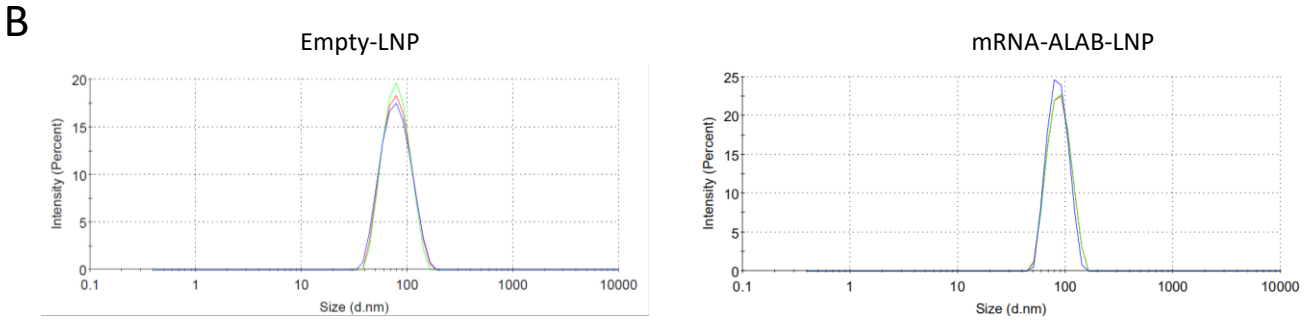

**Figure 2**

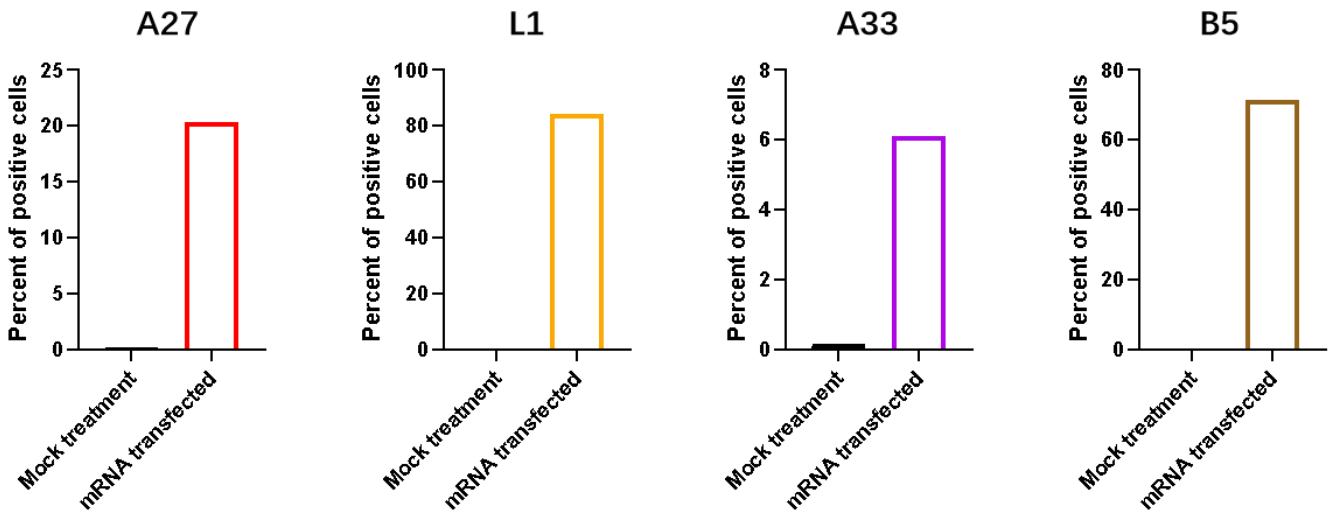

**Figure 3**

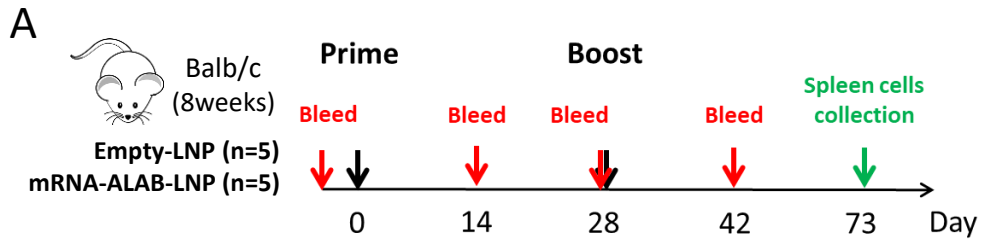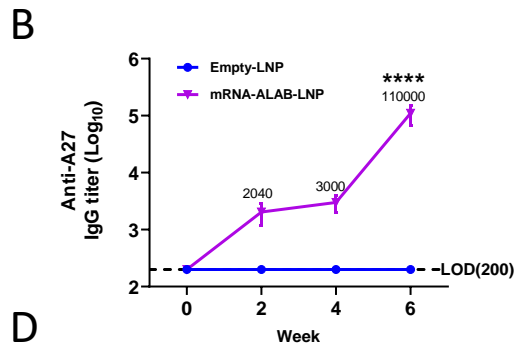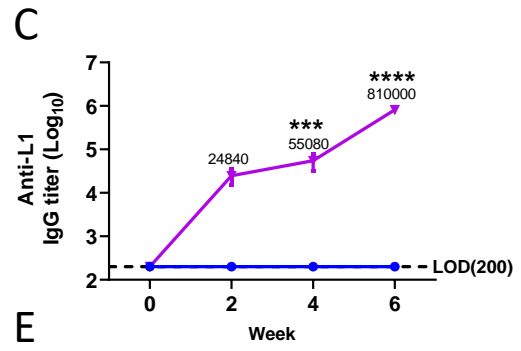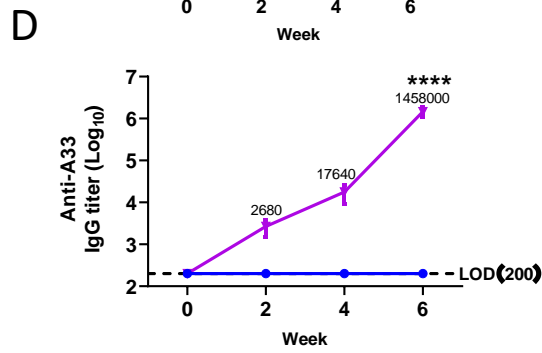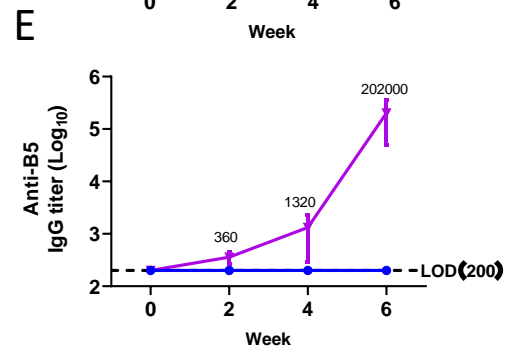

**Figure 4**

A

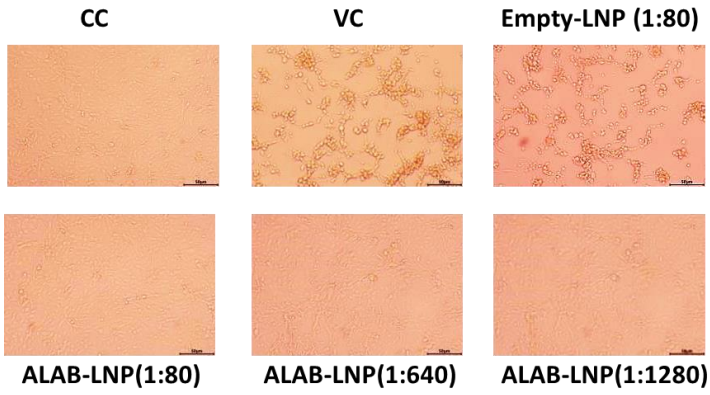

B

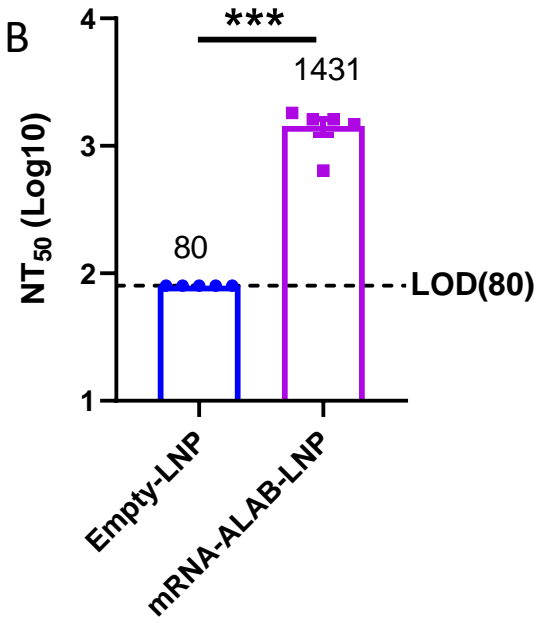

Figure 5



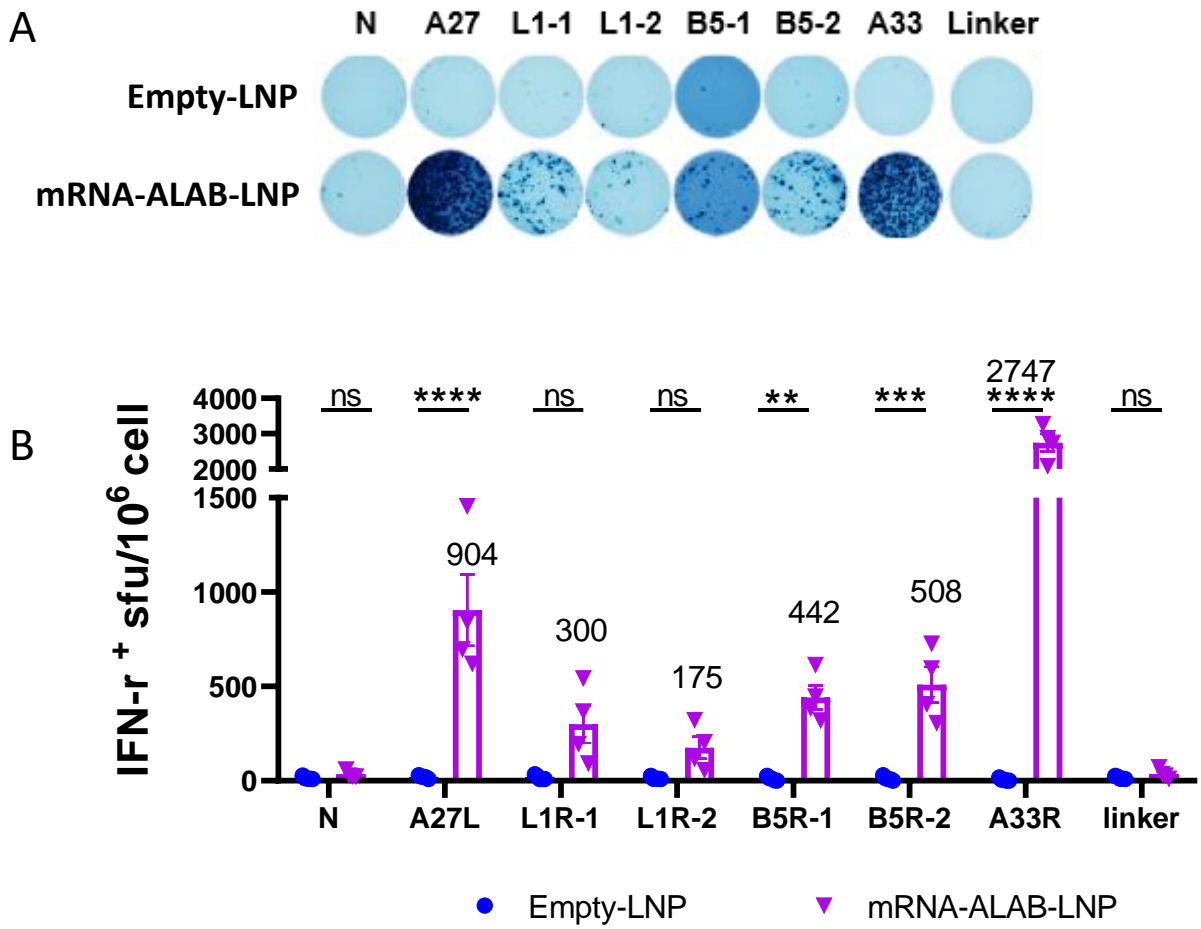

**Figure 6**

**A**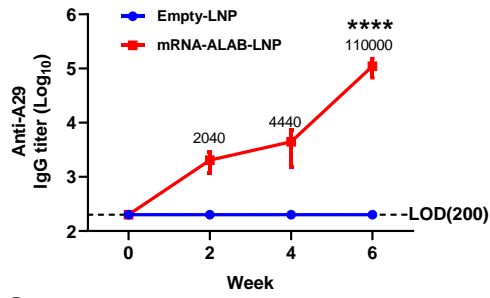**B**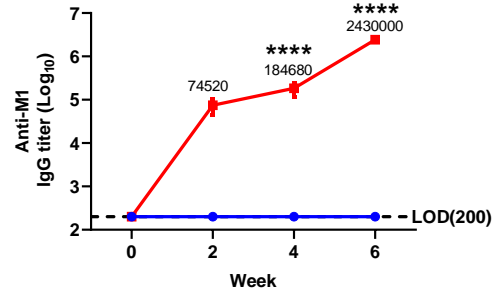**C**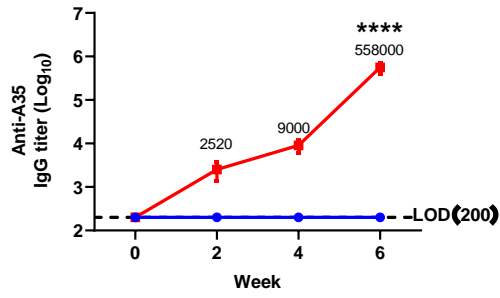**D**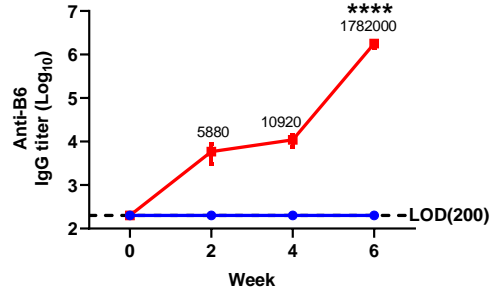**Figure 7**

| <b>Formulation</b> | <b>Size(nm)</b> | <b>PDI</b> | <b>EE</b> |
|--------------------|-----------------|------------|-----------|
| Empty-LNP          | 75.7            | 0.07       | -         |
|                    | 75.9            | 0.05       |           |
|                    | 74.2            | 0.09       |           |
| ALAB-LNP           | 84.6            | 0.04       | 98%       |
|                    | 85.6            | 0.01       |           |
|                    | 83.2            | 0.01       |           |

**Table 1**

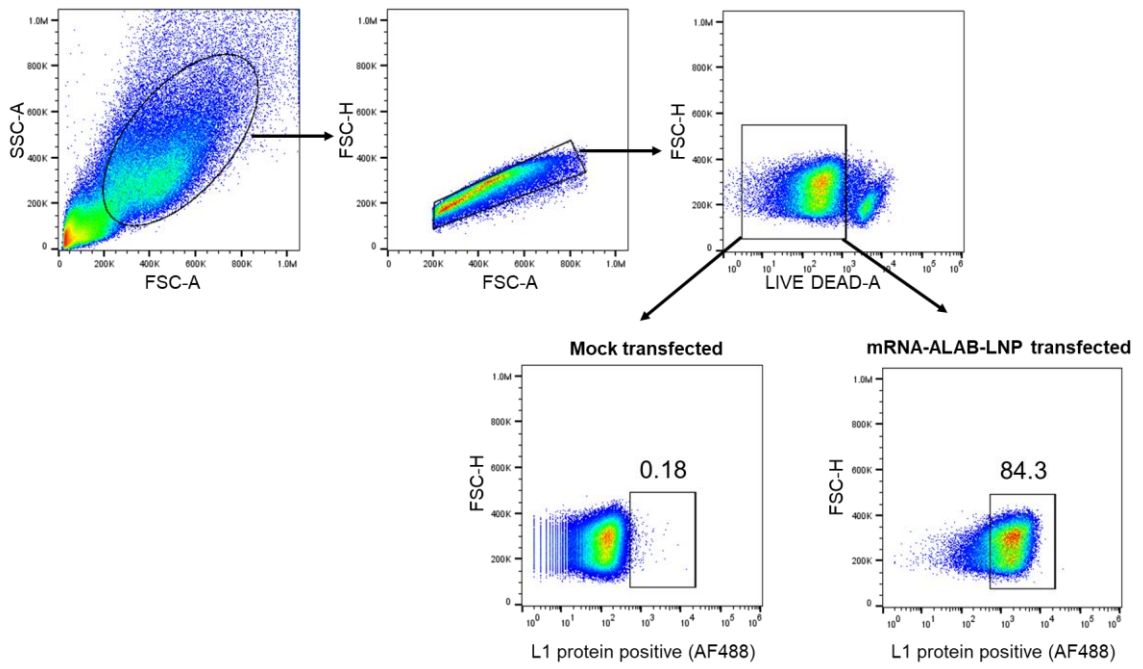

**Figure S1**
